# Supplementary material
Source: publisher site journal article supplement (https://www.dovepress.com/article/505615)
Supplement: Supplementary file 1 [file get_supplementary_file.php]

*Supplementary Material*

Table S1. Questionnaire on Knowledge regarding *Demodex* mites. The responses will be binary (Yes/No), with the following coding for knowledge assessment: 'No' indicates correct knowledge, while 'Yes' signifies incorrect knowledge

| **Questionnaire on Knowledge** | **Total** | **Female** | **Male** | **P-value** |
| --- | --- | --- | --- | --- |
| 1. Are *Demodex* mites parasitic to chickens and other birds? | 244(45.19) | 126(48.65) | 118(41.99) | 0.1210 |
| 2. Can *Demodex* mites be transmitted from animals to humans? | 219(40.56) | 117(45.17) | 102(36.30) | 0.0360 |
| 3. Is the presence of *Demodex* mites on the skin of elderly individuals uncommon? | 282(52.22) | 149(57.53) | 133(47.33) | 0.0180 |
| 4*. A*re *Demodex* mites frequently found on the arms and legs? | 240(44.44) | 134(51.74) | 106(37.72) | 0.0010 |
| 5. Can we examine the skin with a magnifying glass to detect *Demodex* mites? | 187(34.63) | 92(35.52) | 95(33.81) | 0.6760 |
| 6. Can *Demodex* mites be transmitted from person to person? | 287(53.15) | 142(54.83) | 145(51.60) | 0.4530 |
| 7. Are *Demodex* mites more commonly diagnosed in adolescents than older adults? | 260(48.15) | 135(52.12) | 125(44.48) | 0.0760 |
| 8. Can *Demodex* mites cause itchy skin rashes on the arms, legs, and torso? | 215(39.81) | 110(42.47) | 105(37.37) | 0.2260 |
| 9. Can *Demodex* mites cause conjunctivitis? | 179(33.15) | 90(34.75) | 89(31.67) | 0.4480 |
| 10. Can Olive oil be used to kill *Demodex* mites? | 352(65.19) | 195(75.29) | 157(55.87) | <0.001 |
| Overall knowledge (10 scores) | 4.56±2.56 | 4.98±2.60 | 4.18±2.47 | 0.0003 |

Table S2. Questionnaire on Attitude regarding *Demodex* mites. The answers are assessed using a 5-point Likert scale: 1 = Least, 2 = Slightly, 3 = Moderately, 4 = Quite, 5 = Most

| **Questionnaire on Attitude** | **Total** | **Female** | **Male** | **P-value** |
| --- | --- | --- | --- | --- |
| 1. How concerned would you be if *Demodex* mites were detected on your skin? |  |  |  |  |
| Least | 37(6.85) | 6(2.32) | 31(11.03) | <0.001 |
| Slightly | 64(11.85) | 22(8.49) | 42(14.92) |  |
| Moderately | 268(49.63) | 128(49.42) | 140(49.82) |  |
| Quite | 136(25.19) | 93(35.91) | 43(15.30) |  |
| Most | 35(6.48) | 10(3.86) | 25(8.90) |  |
| 2. To what extent do you think *Demodex* mites can impact facial skin health? |  |  |  |  |
| Least | 29(5.37) | 3(1.16) | 26(9.25) | <0.001 |
| Slightly | 44(8.15) | 18(6.95) | 26(9.25) |  |
| Moderately | 213(39.44) | 96(37.07) | 117(41.64) |  |
| Quite | 194(35.93) | 115(44.40) | 79(28.11) |  |
| Most | 60(11.11) | 27(10.42) | 33(11.74) |  |
| 3. How important do you think it is to prevent *Demodex* mites? |  |  |  |  |
| Least | 22(4.07) | 0 | 22(7.83) | <0.001 |
| Slightly | 31(5.74) | 11(4.25) | 20(7.12) |  |
| Moderately | 178(32.96) | 78(30.12) | 100(35.59) |  |
| Quite | 214(39.63) | 126(48.65) | 88(31.32) |  |
| Most | 95(17.59) | 44(16.99) | 51(18.15) |  |
| 4. How much are you interested in learning about *Demodex* mites? |  |  |  |  |
| Least | 20(3.70) | 1(0.39) | 19(6.76) | <0.001 |
| Slightly | 29(5.37) | 13(5.02) | 16(5.69) |  |
| Moderately | 211(39.07) | 89(34.36) | 122(43.42) |  |
| Quite | 196(36.30) | 119(45.95) | 77(27.40) |  |
| Most | 84(15.56) | 37(14.29) | 47(16.73) |  |
| 5. How important is it to educate about *Demodex* mites in schools? |  |  |  |  |
| Least | 18(3.33) | 1(0.39) | 17(6.05) | <0.001 |
| Slightly | 22(4.07) | 11(4.25) | 11(3.91) |  |
| Moderately | 182(33.70) | 81(31.27) | 101(35.94) |  |
| Quite | 200(37.04) | 114(44.02) | 86(30.60) |  |
| Most | 118(21.85) | 52(20.08) | 66(23.49) |  |
| Overall attitudes (25 scores) | 17.37±3.88 | 18.13±3.15 | 16.68±4.34 | **<**0.001 |
|  |  |  |  |  |

Table S3. Questionnaire on Awareness regarding *Demodex* mites. The answers are assessed using a 5-point Likert scale: 1 = Least, 2 = Slightly, 3 = Moderately, 4 = Quite, 5 = Most.

| **Questionnaire on Awareness** | **Total** | **Female** | **Male** | **P-value** |
| --- | --- | --- | --- | --- |
| 1. How familiar are you with *Demodex* mites? |  |  |  |  |
| Least | 185(34.26) | 93(35.91) | 92(32.74) | 0.024 |
| Slightly | 168(31.11) | 84(32.43) | 84(29.89) |  |
| Moderately | 147(27.22) | 67(25.87) | 80(28.47) |  |
| Quite | 23(4.26) | 13(5.02) | 10(3.56) |  |
| Most | 17(3.15) | 2(0.77) | 15(5.34) |  |
| 2. How probable is it that the general population will become infested with *Demodex* mites? |  |  |  |  |
| Least | 33(6.11) | 11(4.25) | 22(7.83) | 0.008 |
| Slightly | 103(19.07) | 41(15.83) | 62(22.06) |  |
| Moderately | 244(45.19) | 123(47.49) | 121(43.06) |  |
| Quite | 118(21.85) | 69(26.64) | 49(17.44) |  |
| Most | 42(7.78) | 15(5.79) | 27(9.61) |  |
| 3. How much have you ever wondered if you might have *Demodex* mites on your face? |  |  |  |  |
| Least | 97(18.10) | 40(15.69) | 57(20.28) | 0.063 |
| Slightly | 120(22.39) | 67(26.27) | 53(18.86) |  |
| Moderately | 208(38.81) | 97(38.04) | 111(39.50) |  |
| Quite | 79(14.74) | 41(16.08) | 38(13.52) |  |
| Most | 32(5.97) | 10(3.92) | 22(7.83) |  |
| 4. How necessary is it that everyone with a facial skin rash is tested for *Demodex* mites? |  |  |  |  |
| Least | 24(4.44) | 7(2.70) | 17(6.05) | 0.157 |
| Slightly | 72(13.33) | 32(12.36) | 40(14.23) |  |
| Moderately | 239(44.26) | 117(45.17) | 122(43.42) |  |
| Quite | 158(29.26) | 84(32.43) | 74(26.33) |  |
| Most | 47(8.70) | 19(7.34) | 28(9.96) |  |
| 5. Have you noticed any facial abnormalities that *Demodex* mites may cause on your face? |  |  |  |  |
| Least | 116(21.48) | 65(25.10) | 51(18.15) | 0.052 |
| Slightly | 159(29.44) | 81(31.27) | 78(27.76) |  |
| Moderately | 198(36.67) | 85(32.82) | 113(40.21) |  |
| Quite | 45(8.33) | 22(8.49) | 23(8.19) |  |
| Most | 22(4.07) | 6(2.32) | 16(5.69) |  |
| Overall awareness (25 scores) | 13.52±3.59 | 13.39±3.35 | 13.63±3.80 | 0.6988 |

Table S4. Questionnaire on Practice regarding *Demodex* mites. The answers are assessed using a 5-point Likert scale: 1 = Never, 2 = Rarely, 3 = Moderately, 4 = Somewhat, 5 = Always.

| **Questionnaire on Preventive Practice** | **Total** | **Female** | **Male** | **P-value** |
| --- | --- | --- | --- | --- |
| 1. Do you clean your face at least twice a day? |  |  |  |  |
| Never | 20(3.70) | 1(0.39) | 19(6.76) | <0.001 |
| Rarely | 18(3.33) | 4(1.54) | 14(4.98) |  |
| Moderately | 66(12.22) | 22(8.49) | 44(15.66) |  |
| Somewhat | 283(52.41) | 141(54.44) | 142(50.63) |  |
| Always | 153(28.33) | 91(35.14) | 62(22.06) |  |
| 2. Do you clean your makeup tools at least once a week? |  |  |  |  |
| Never | 39(7.22) | 8(3.09) | 31(11.03) | <0.001 |
| Rarely | 46(8.52) | 27(10.42) | 19(6.79) |  |
| Moderately | 141(26.11) | 51(19.69) | 90(32.03) |  |
| Somewhat | 227(42.04) | 124(47.88) | 103(36.65) |  |
| Always | 87(16.11) | 49(18.92) | 38(13.52) |  |
| 3. You usually never share makeup products and tools with others. |  |  |  |  |
| Never | 43(7.96) | 9(3.47) | 34(12.10) | <0.001 |
| Rarely | 37(6.85) | 19(7.34) | 18(6.41) |  |
| Moderately | 101(18.70) | 36(13.90) | 65(23.13) |  |
| Somewhat | 190(35.19) | 107(41.31) | 83(29.54) |  |
| Always | 169(31.30) | 88(33.98) | 81(28.83) |  |
| 4. Do you change your pillowcase at least once a week? |  |  |  |  |
| Never | 23(4.26) | 4(1.54) | 19(6.76) | 0.006 |
| Rarely | 64(11.85) | 37(14.29) | 27(9.61) |  |
| Moderately | 101(18.70) | 42(16.22) | 59(21.00) |  |
| Somewhat | 254(47.04) | 123(47.49) | 131(46.62) |  |
| Always | 98(18.15) | 53(20.46) | 45(16.01) |  |
| 5. How often do you seek medical advice as your first step when experiencing facial problems? |  |  |  |  |
| Never | 22(4.07) | 4(1.54) | 18(6.41) | 0.068 |
| Rarely | 49(9.07) | 24(9.27) | 25(8.90) |  |
| Moderately | 103(19.07) | 49(18.92) | 54(19.22) |  |
| Somewhat | 262(48.52) | 132(50.97) | 130(46.26) |  |
| Always | 104(19.26) | 50(19.31) | 54(19.22) |  |
| Overall practice (25 scores) | 18.57±3.73 | 19.35±3.10 | 17.86±4.10 | <0.001 |
